# Supplementary figures and images for: High-density interspecific genetic maps of kiwifruit and the identification of sex-specific markers
Source: PubMed Central journal article supplement — DNA Res. 2015 Sep 14;22(5):367–75. doi: 10.1093/dnares/dsv019 (PMC4596402; doi:10.1093/dnares/dsv019), 2015-09-14

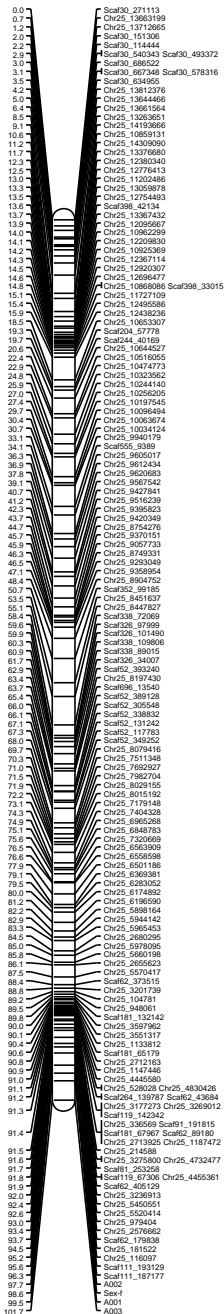

Supplement: supp_dsv019_dsv019supp_fig1.pdf [file supp_dsv019_dsv019supp_fig1.pdf]
